# Supplementary material for: Apple consumption affects cecal health by regulating 12S-hydroxy-5Z,8Z,10E,14Z-eicosatetraenoic acid (12(S)-HETE) levels through modifying the microbiota in rats
Source: Royal Society of Chemistry journal article supplement (doi:10.1039/d3fo03207h), 2023-01-01
Supplement: d3fo03207h1.pdf [file d3fo03207h1.pdf]

## Supplemental Data: Figures S1-S7, Tables S1-S3.

**Table S1. Nutrient content per 100 g of *Malus pumila* Mill**

---

|                               |             |
|-------------------------------|-------------|
| Energy                        | 63 kcal     |
| Protein                       | 0.20 g      |
| Fat                           | 0.18 g      |
| Carbohydrate                  | 15.22 g     |
| Crude fiber                   | 2.10 g      |
| Lipids                        |             |
| Carotene                      | 17.00 µg    |
| Lutein                        | 22.00 µg    |
| Minerals                      |             |
| Calcium                       | 7.00 mg     |
| Magnesium                     | 5.00 mg     |
| Sodium                        | 1.00 mg     |
| Potassium                     | 109.00 mg   |
| Phosphorus                    | 13.00 mg    |
| Sulfur                        | 0.001391 mg |
| Chlorine                      | 1.542 mg    |
| Iron                          | 0.10 mg     |
| Zinc                          | 0.04 mg     |
| Copper                        | 0.025 mg    |
| Manganese                     | 0.031 mg    |
| Vitamins                      |             |
| Vitamin A                     | 11.40 mg    |
| Vitamin E                     | 0.18 mg     |
| Vitamin K                     | 1.00 µg     |
| Vitamin P (flavonoids)        | 75.60 mg    |
| Vitamin B1 (thiamine)         | 0.013 mg    |
| Vitamin B2 (Riboflavin)       | 0.026 mg    |
| Vitamin B3 (Niacin)           | 0.07 mg     |
| Vitamin B4 (choline)          | 3.40 mg     |
| Vitamin B5 (pantothenic acid) | 0.051 mg    |
| Vitamin B6                    | 0.045 mg    |
| Vitamin B9 (folic acid)       | 3.00 µg     |

---

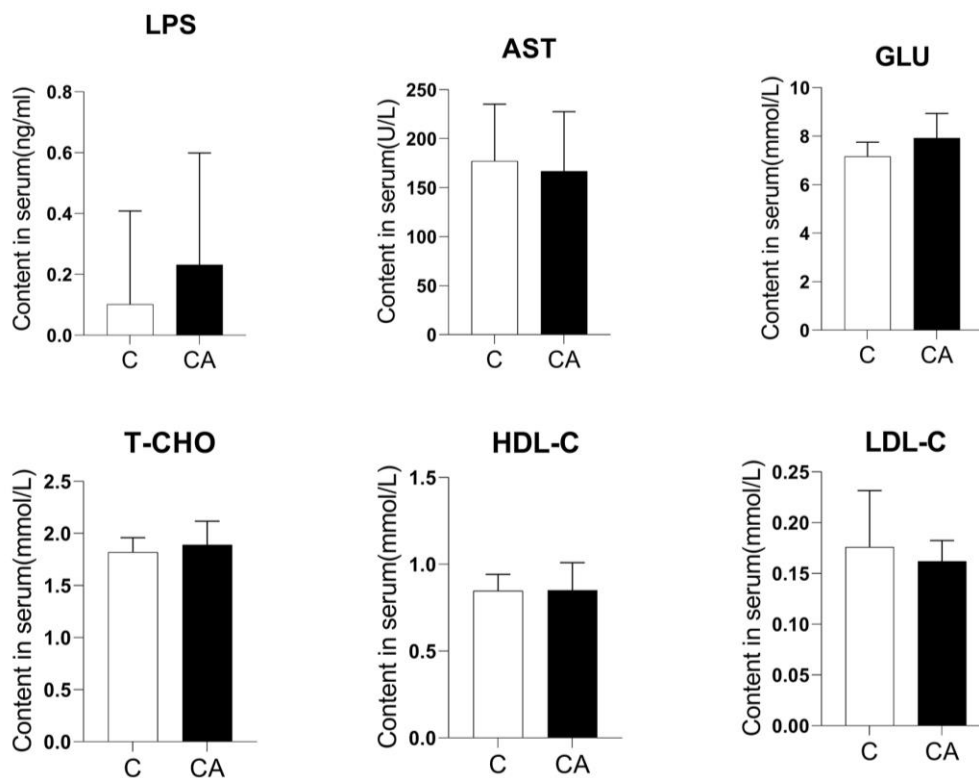

**Fig. S1. Levels of relevant indicators in the blood serum.** The indicator names are Lipopolysaccharide (LPS), Alanine aminotransferase (ALT), Aspartate aminotransferase (AST), Glucose (GLU), Total Cholesterol (T-CHO), High-density lipoprotein cholesterol (HDL-C), and Low-Density Lipoprotein Cholesterol (LDL-C).

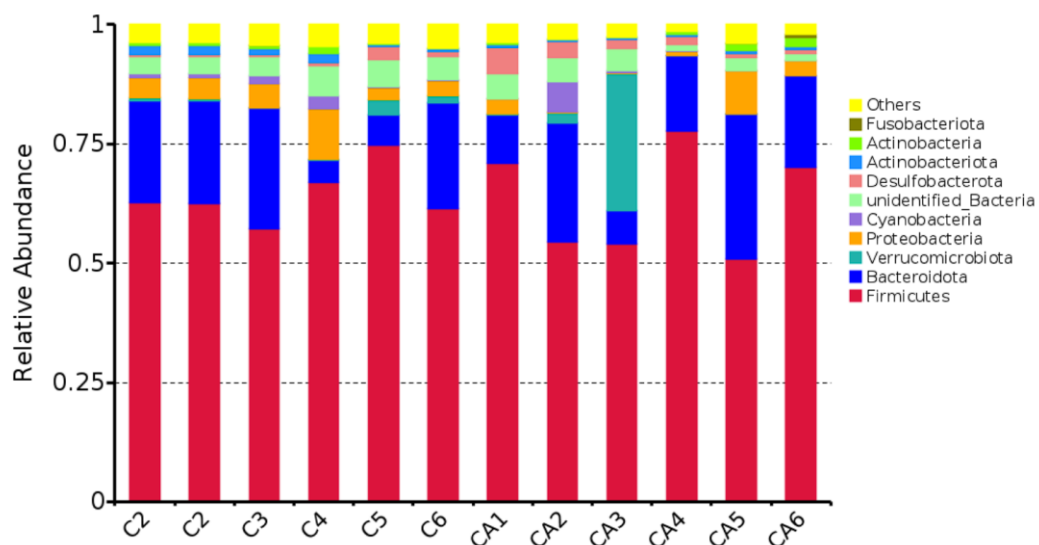

**Fig. S2. Histogram of relative abundance of species at the phylum level**

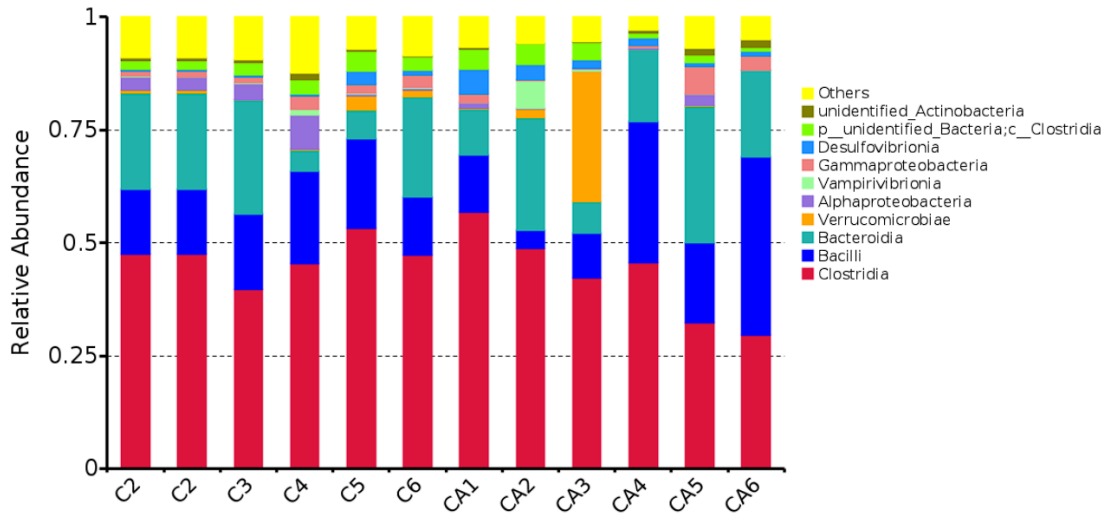

**Fig. S3. Histogram of relative abundance of species at the class level**

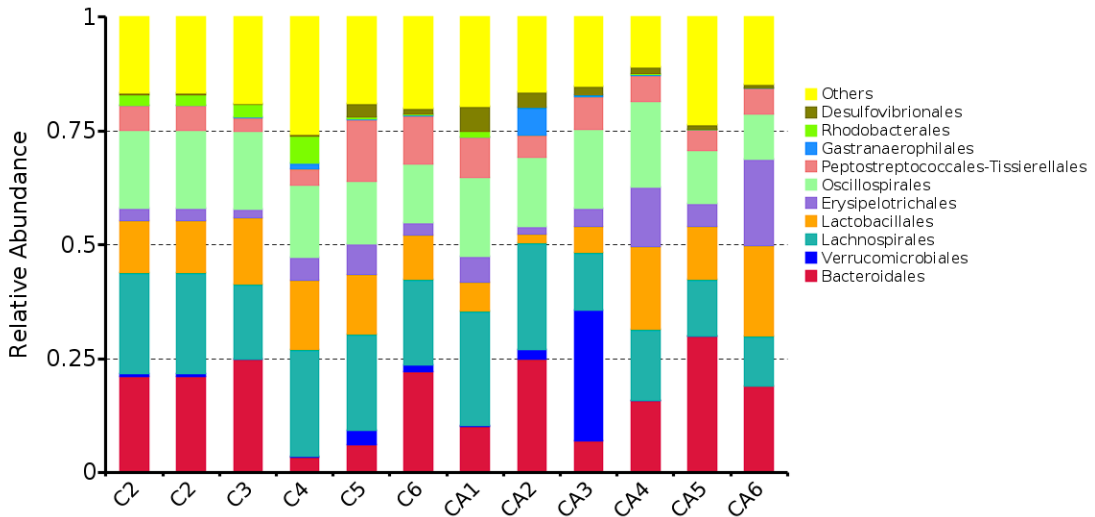

**Fig. S4. Histogram of relative abundance of species at the order level**

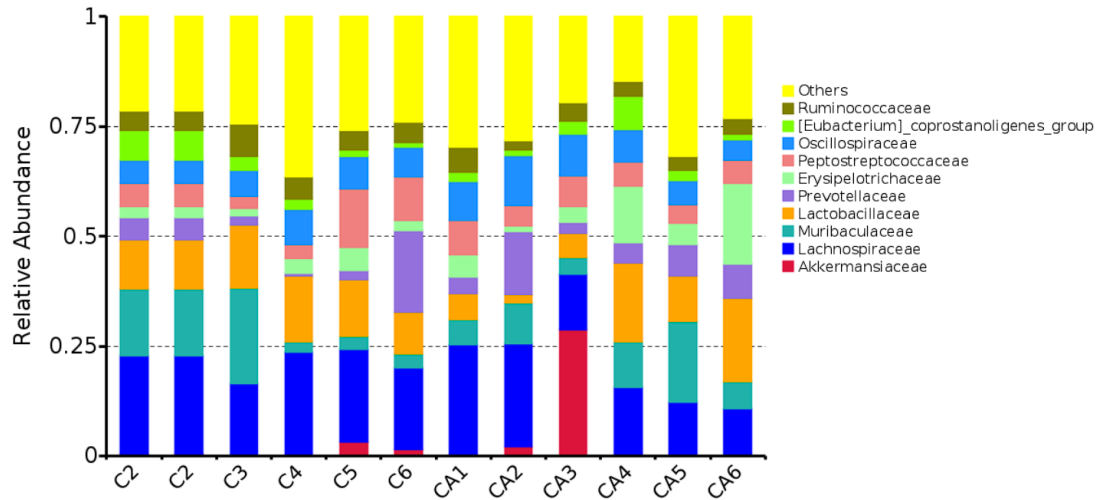

**Fig. S5. Histogram of relative abundance of species at the family level**

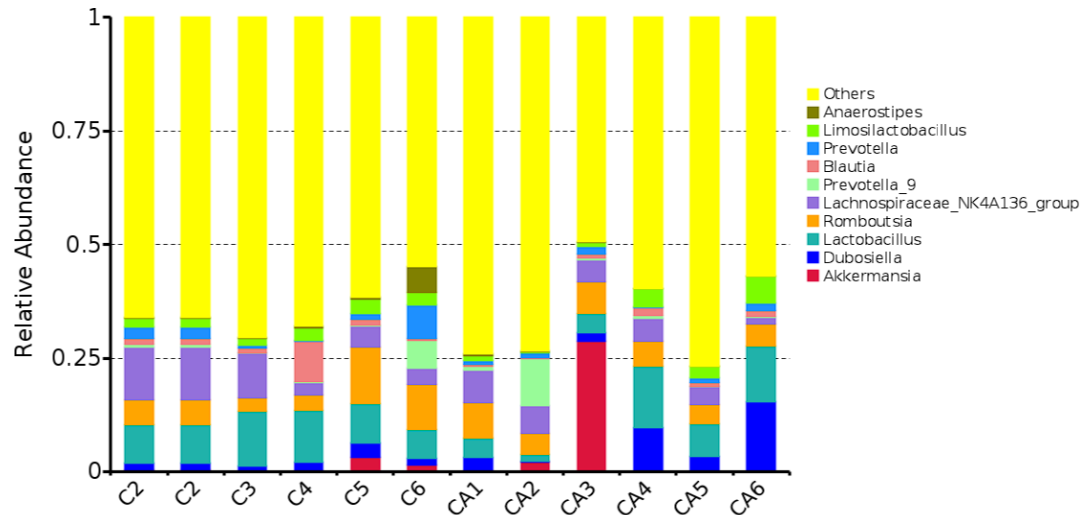

**Fig. S6. Histogram of relative abundance of species at the genus level**

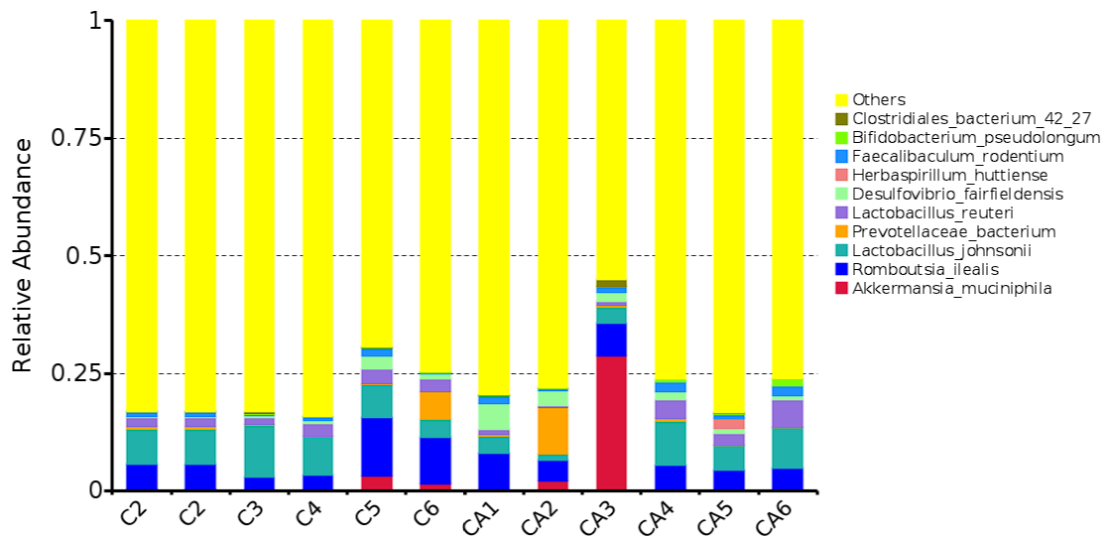

**Fig. S7. Histogram of relative abundance of species at the species level**

**Table S2. The primers that were used in this study.**

| Gene name     | Gene ID        | FORWARD                    | REVERSE                   |
|---------------|----------------|----------------------------|---------------------------|
| ACTB          | XM_039089807.1 | GGAGATTACTGCCCTGGCTCCTA    | GACTCATCGTACTCCTGCTTGCTG  |
| NRF2          | NM_001399173.1 | GCCTTCCTCTGCTGCCATTAGTC    | TGCCTTCAGTGTGCTTCTGGTTG   |
| HO-1          | NM_012580.2    | CAGGTGTCCAGGGAAGGCTTTAAG   | TGGGTTCTGCTTGTTTCGCTCTATC |
| NQO1          | NM_017000.3    | AGGATGGGAGGTGGTCGAATCTG    | GCCTTCCTTATACGCCAGAGATGAC |
| TLR4          | NM_019178.2    | CAGAATGAGGACTGGGTGAGAAACG  | TCCTGGATGATGTTGGCAGCAATG  |
| IL-6          | NM_012589.2    | ACTTCCAGCCAGTTGCCTTCTTG    | TGGTCTGTTGTGGGTGGTATCCTC  |
| TNF- $\alpha$ | NM_012675.3    | ATGGGCTCCCTCTCATCAGTTCC    | CCTCCGCTTGGTGGTTTGCTAC    |
| IL-1 $\beta$  | NM_031512.2    | AATCTCACAGCAGCATCTCGACAAG  | TCCACGGCAAGACATAGGTAGC    |
| IL-10         | NM_012854.2    | GGCAGTGGAGCAGGTGAAGAATG    | TGTCACGTAGGCTTCTATGCAGTTG |
| Bax           | NM_017059.2    | AGACACCTGAGCTGACCTTGGAG    | TTCATCGCCAATTCGCCTGAGAC   |
| Casp3         | NM_012922.2    | GCGGTATTGAGACAGACAGTGG AAC | AACCATGACCCGTCCTTGAATTC   |
| Casp9         | NM_031632.2    | CAAGAAGAGCGGTTCTGGTACATC   | CAGCATTGGCGACCCTGAGAAG    |
| ZO-1          | NM_001106266.1 | GCCAAGCCAGTCCATTCTCAGAG    | TCCATAGCATCAGTTTCGGGTTTCC |
| Claudin-1     | NM_031699.3    | CTTCTGGGTTTCATCCTGGCTTCG   | CCTGAGCAGTCACGATGTTGTCC   |

**Table S3. Metabolite index and name in metabolomics data of cecum contents.**

| Index     | Name                                                                                 |
|-----------|--------------------------------------------------------------------------------------|
| MEDN1461  | (±)7(8)-DiHDPE(A)                                                                    |
| MW0012259 | 12S-Hydroxy-5Z,8Z,10E,14Z-eicosatetraenoic acid                                      |
| MEDP0074  | N-Propionylglycine                                                                   |
| MEDP0184  | 3,3',5-Triiodo-L-Thyronine                                                           |
| MEDP0244  | All-Trans-13,14-Dihydroretinol                                                       |
| MEDP0394  | 4-Hydroxyretinoic Acid                                                               |
| MEDP0525  | N-Acetyl-L-alanine                                                                   |
| MEDP0529  | Indole-3-acetamide                                                                   |
| MW0063250 | Quadrone                                                                             |
| MEDP1097  | MG(18:2/0:0/0:0)                                                                     |
| MW0152946 | Lys-Gln-Val                                                                          |
| MW0012210 | 12'-Apo-b-carotene-3,12'-diol                                                        |
| MEDP1430  | Carnitine C7:0                                                                       |
| MW0012403 | 15(S)-15-Methylprostaglandin E2                                                      |
| MEDP1926  | Cyclo(Pro-Phe)                                                                       |
| MW0001570 | 1H-1,2,3-Triazole-1-octanamide, N-[1,1'-biphenyl]-2-yl-4-(3-pyridinyl)-              |
| MW0002223 | 2,4-Diaminotoluene                                                                   |
| MW0010972 | (24S)-Cholest-5-ene-3beta,7alpha,24-triol                                            |
| MW0010977 | (25R)-3beta,4beta-dihydroxycholest-5-en-26-al                                        |
| MW0013918 | 3alpha,7alpha,12alpha,24(S)-tetrahydroxy-5beta-cholestan-27-al                       |
| MW0012861 | 1-Myristoyl-2-hydroxy-sn-glycero-3-phosphoethanolamine                               |
| MW0011423 | (5α)-Androstane-3,11,17-trione                                                       |
| MW0011450 | (6R,8Z)-6-Hydroxy-3-oxotetradecenoic acid                                            |
| MW0158846 | Urocortisol;Tetrahydrocortisol;5beta-Pregnane-3alpha,11beta,17alpha,21-tetrol-20-one |
| MEDP1193  | Flavin Single Nucleotide(FMN)                                                        |
| MEDP0029  | Cysteamine                                                                           |
| MW0013961 | 3beta,5alpha,6beta-Trihydroxycholestane                                              |
| MW0013112 | 2,3-dinor Prostaglandin E1                                                           |
| MW0013883 | 3a,11b,21-Trihydroxy-20-oxo-5b-pregnan-18-al                                         |
| MEDP0556  | Herniarin                                                                            |
| MW0142913 | 3-Epiecdysone                                                                        |
| MW0016315 | Camellenodiol                                                                        |

---

|           |                                                                                                                                               |
|-----------|-----------------------------------------------------------------------------------------------------------------------------------------------|
| MW0017043 | Chenodeoxycholic acid sulfate                                                                                                                 |
| MW0017134 | cis-11-Methyl-2-dodecenoic acid                                                                                                               |
| MW0053462 | Ganodosterone                                                                                                                                 |
| MW0053831 | Hecogenin                                                                                                                                     |
| MW0054786 | Methoprene acid                                                                                                                               |
| MW0061077 | Persenone B                                                                                                                                   |
| MW0061088 | Petromyzonol                                                                                                                                  |
| MW0062133 | Polyporusterone F                                                                                                                             |
| MEDP1690  | LPC(20:0/0:0)                                                                                                                                 |
| MW0063491 | Secasterone                                                                                                                                   |
| MW0103264 | $\beta$ -Tocotrienol                                                                                                                          |
| MW0011223 | (3beta,5alpha,6beta,9alpha,22E,24R)-5,9-Epideoxyergosta-7,22-diene-3,6-diol                                                                   |
| MW0109005 | Orlistat                                                                                                                                      |
| MW0120090 | 4,6-Dihydroxyquinoline                                                                                                                        |
| MW0155702 | Pregnan-20-one, 17-(acetyloxy)-3-hydroxy-6-methyl-,(3b,5b,6a)-                                                                                |
| MW0011227 | (3beta,5alpha,9alpha,22E,24R)-5,9-Epideoxy-3-hydroxyergosta-7,22-dien-6-one                                                                   |
| MW0122903 | Arachidonoyl Serotonin                                                                                                                        |
| MW0123330 | Cilostazol                                                                                                                                    |
| MEDP1396  | Carnitine C15:1:DC                                                                                                                            |
| MW0143742 | 6,8a-Seco-6,8a-deoxy-5-oxoavermectin "1b" aglycone                                                                                            |
| MW0144017 | 8,12-Diethylbacteriochlorophyllide d                                                                                                          |
| MW0107715 | Leu-Cys-Arg                                                                                                                                   |
| MW0152026 | Kikkanol A                                                                                                                                    |
| MW0152260 | Leu-Asp-Gln-Gln-Val                                                                                                                           |
| MW0122849 | AMP-Deoxynojirimycin                                                                                                                          |
| MW0153035 | Lys-Leu-Glu-Arg                                                                                                                               |
| MW0153596 | Met-Leu-His                                                                                                                                   |
| MW0155639 | Podecdysone B                                                                                                                                 |
| MW0122717 | Acepromazine                                                                                                                                  |
| MW0151774 | Iriomoteolide 1a;Iriomoteolide-1a                                                                                                             |
| MW0160858 | N-[(E,2S,3R)-3-hydroxy-1-[(2R,5S,6R)-3,4,5-trihydroxy-6-(hydroxymethyl)oxan-2-yl]oxyoctadec-4-en-2-yl]docosanamide                            |
| MW0164209 | (2R,5R,7S,16S)-15-[(2S,3R,4R,5S)-3,4-dihydroxy-5,6-dimethylheptan-2-yl]-5-hydroxy-2,16-dimethyl-9-oxatetracyclo[9.7.0.0.2,7.0]octadecan-8-one |

---
